# Supplementary material for: Caenorhabditis elegans Maintains Highly Compartmentalized Cellular Distribution of Metals and Steep Concentration Gradients of Manganese
Source: PubMed Central journal article supplement (PMC3290589; doi:10.1371/journal.pone.0032685), 2012-02-29
Supplement: pone.0032685.s001.pdf [file pone.0032685.s001.pdf]

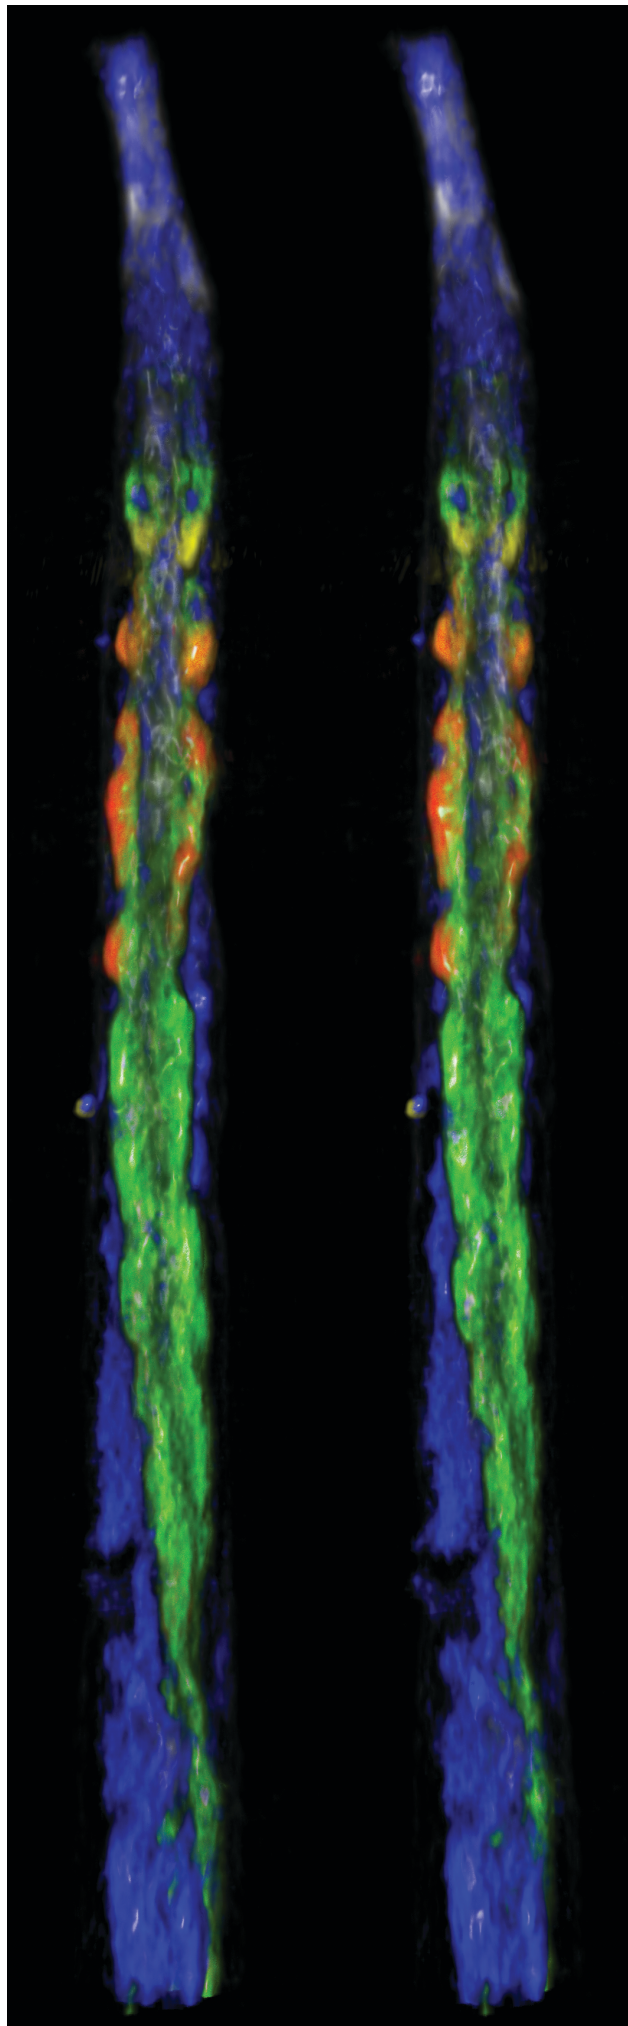

Fig S2.
